# Supplementary material
Source: HighWire-hosted journal article supplement (https://sti.bmj.com/content/95/2/87)

**Supplementary figure 1.** Subject disposition and specimen evaluability for A) prospectively collected specimens B) archived specimens

A)

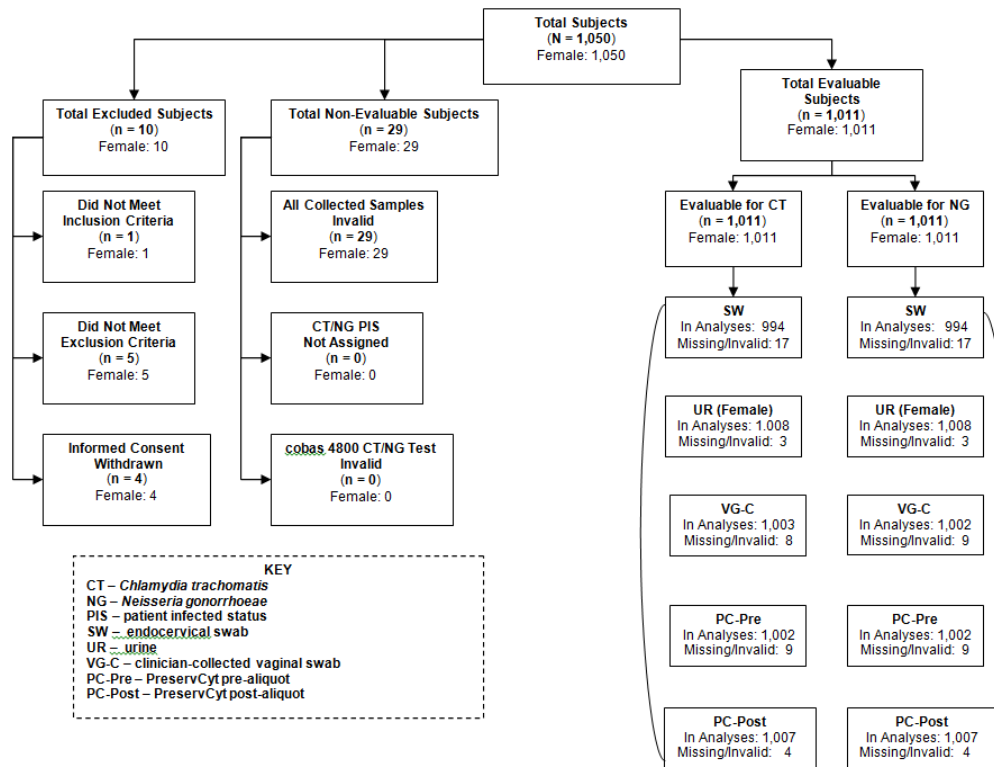

B)

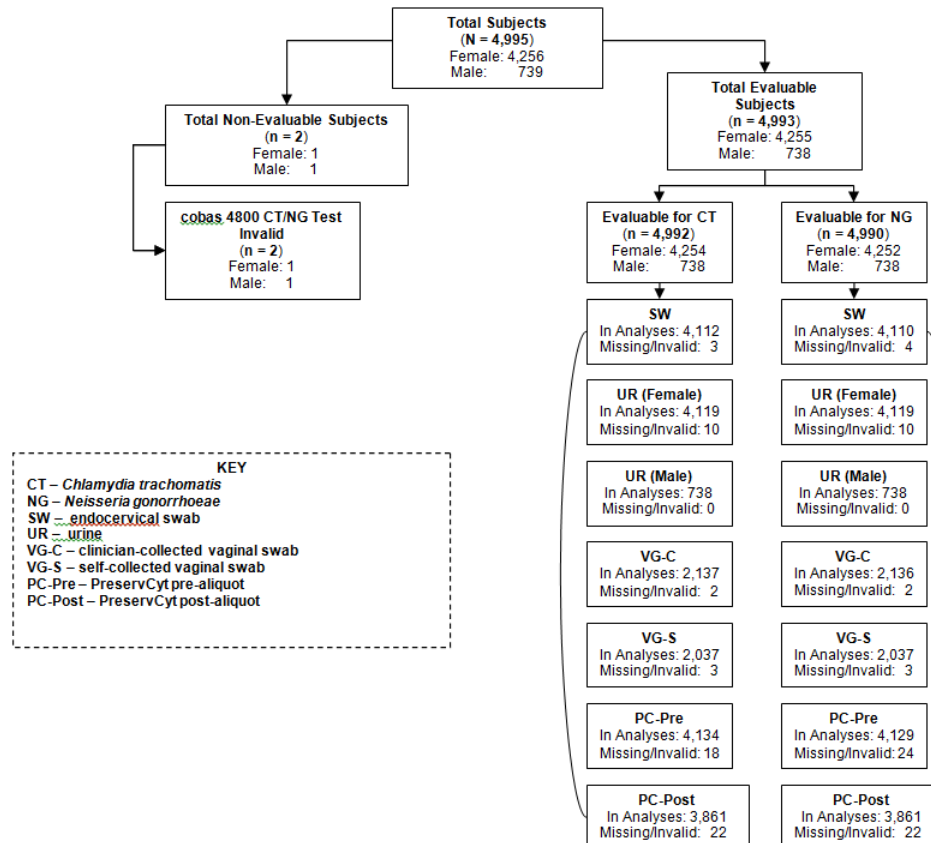

Supplement: inline-supplementary-material-2 [file inline-supplementary-material-2.pdf]
